# Supplementary material for: Baicalein Suppresses Stem Cell-Like Characteristics in Radio- and Chemoresistant MDA-MB-231 Human Breast Cancer Cells through Up-Regulation of IFIT2
Source: PubMed Central journal article supplement (PMC6471144; doi:10.3390/nu11030624), 2019-03-14
Supplement: nutrients-11-00624-s001.pdf [file nutrients-11-00624-s001.pdf]

**Supplementary Table S1.** IC<sub>50</sub> of phytochemical treatments on MDA-MB-231 cells and MDA-MB-231/IR cells. Asterisks (\*) indicate significant differences at  $p < 0.05$ .

| No. | Group    | Phytochemical       | IC <sub>50</sub> (μM) |                 |
|-----|----------|---------------------|-----------------------|-----------------|
|     |          |                     | MDA-MB-231            | MDA-MB-231/IR   |
| 1   |          | Apigenin            | 75.12 ± 1.85          | 83.11 ± 4.01 *  |
| 2   | Flavone  | Baicalein           | 44.25 ± 2.47          | 38.58 ± 2.86 *  |
| 3   |          | Tangeretin          | > 200                 | > 200           |
| 4   |          | Kaempferol          | > 200                 | 198.52 ± 5.12   |
| 5   | Flavonol | Myricetin           | 30.29 ± 1.87          | 78.61 ± 1.97 *  |
| 6   |          | Quercetin           | > 200                 | 167.43 ± 2.37 * |
| 7   |          | Rutin               | > 200                 | > 200           |
| 8   | Phenol   | Catechol            | 185.21 ± 3.69         | 92.16 ± 1.98 *  |
| 9   |          | Chlorogenic acid    | > 200                 | 183.66 ± 3.10 * |
| 10  |          | Protocatechuic acid | > 200                 | > 200           |

**Supplementary Table S2.** CI value of combination treatments on MDA-MB-231/IR cells.

| Adriamycin (nM) | Baicalein ( $\mu$ M) | CI value | Cisplatin ( $\mu$ M) | Baicalein ( $\mu$ M) | CI value |
|-----------------|----------------------|----------|----------------------|----------------------|----------|
| 12.50           | 10.00                | 1.88     | 10.00                | 10.00                | 1.02     |
| 12.50           | 20.00                | 0.82     | 10.00                | 15.00                | 0.79     |
| 25.00           | 10.00                | 1.70     | 20.00                | 10.00                | 1.08     |
| 25.00           | 20.00                | 0.57     | 20.00                | 15.00                | 0.83     |
| 50.00           | 10.00                | 0.60     | 30.00                | 10.00                | 0.94     |
| 50.00           | 20.00                | 0.41     | 30.00                | 15.00                | 0.61     |
| 100.00          | 10.00                | 0.42     | 40.00                | 10.00                | 0.54     |
| 100.00          | 20.00                | 0.40     | 40.00                | 15.00                | 0.32     |

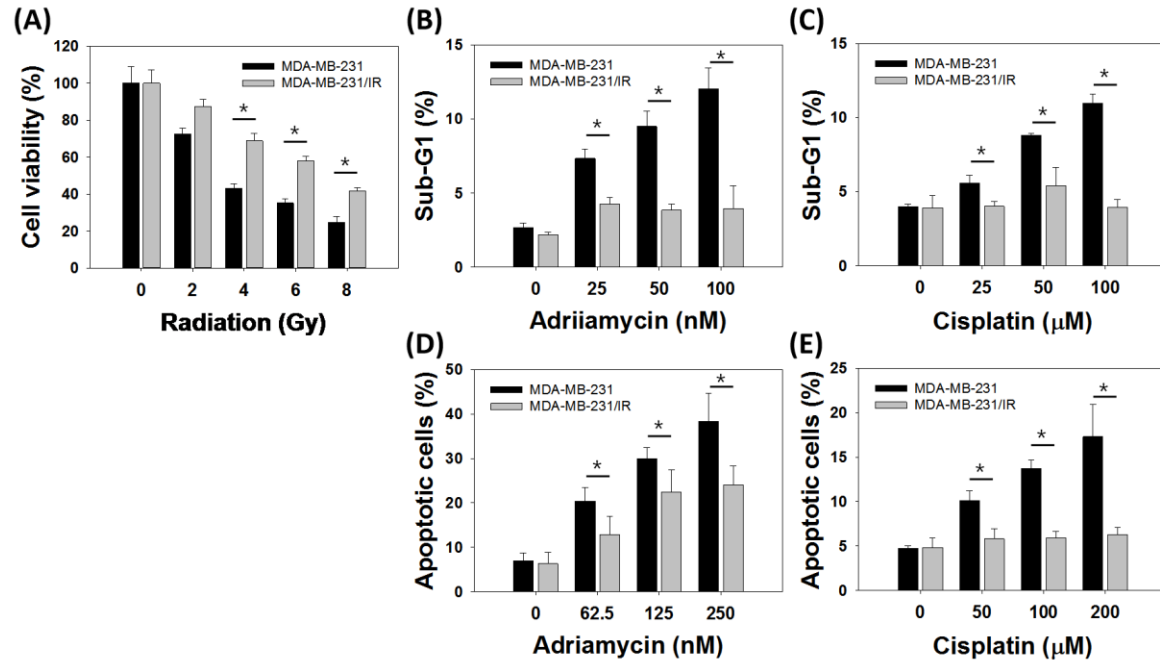

**Supplementary Figure S1.** Cell viabilities and induction of apoptosis in MDA-MB-231 cells and MDA-MB-231/IR cells treated with irradiation or anti-cancer drugs. (A) MTT assay of cells after irradiation. (B,C) Cells in sub-G1 were analyzed by FACS after Adriamycin and cisplatin treatment for 24 h. (D,E) Annexin V/PI analysis of cells after Adriamycin and cisplatin treatment for 24 h. Asterisks (\*) indicate significant differences at  $p < 0.05$ .
